# Supplementary material
Source: PubMed Central journal article supplement (PMC2802895)
Supplement: me.2009-0303_1.pdf [file me.2009-0303_1.pdf]

## Supplementary figure legends

**Fig. S1: *Rhox5* Expression in Sertoli Cell Lines.** qPCR analysis of total cellular RNA from 15P-1, MSC-1, and Tm4 Sertoli cells. Adult testes and spleen served as positive and negative controls, respectively (1). All values were quantified as described in Fig. 1B. The values denote the mean fold change  $\pm$  SEM.

**Fig. S2: RHOX5 Protein is Undetectable in Parental 15P-1 Cells.** Western blot analysis of RHOX5 protein expression in 15P-1 cells, performed as described in Fig. 1A. SL12.4 cells serves as a positive control.

**Fig. S3: *Rhox5*-Regulated Genes in 15P-1 Cells.** Classification of proteins encoded by genes regulated by 2-fold or more in response to *Rhox5* (from Supplementary table 1 and 2), determined using OntoExpress software.

**Fig. S4: *Rhox5*-Upregulated Genes in 15P-1 Cells.** Classification of proteins encoded by genes upregulated by 2-fold or more in response to *Rhox5* (from Supplementary table 1), determined using OntoExpress software.

**Fig. S5: *Rhox5*-Downregulated Genes in 15P-1 Cells.** Classification of proteins encoded by genes downregulated by 2-fold or more in response to *Rhox5* (from Supplementary table 1), determined using OntoExpress software.

**Fig. S6: Developmental Expression Pattern of *Rhox5*-Regulated Genes.** qPCR analysis of testes RNA from *Rhox5*-null (KO) and wild-type (WT) littermate mice of the indicated postnatal ages (6 mice per time point), quantified and normalized as described in Fig. 5. The genes shown in this figure did not exhibit an appreciable change in developmental expression pattern in *Rhox5*-null mice relative to control mice.

**Fig. S7. The Candidate SAR Genes do Not Respond to AR and Androgen *In Vitro*.** qPCR analysis of total cellular RNA from 15P-1 cells in the presence or absence of AR and androgen, quantified and normalized as described in Fig. 1B. “+AR” denotes cells cotransfected with an AR expression vector (100 ng) and “+T” denotes cells incubated with the synthetic androgen R1881.

1. MacLean JA, Chen MA, Wayne CM, Bruce SR, Rao MK, Meistrich ML, MacLeod CL, Wilkinson MF 2005 *Rhox*: A new homeobox gene cluster. *Cell* 120:369-382

Supplemental Figure 1

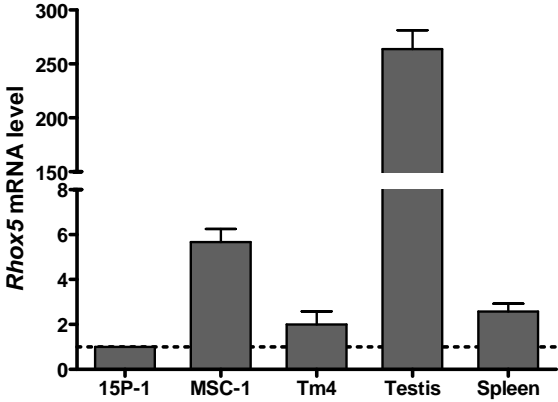

Supplemental Figure 2

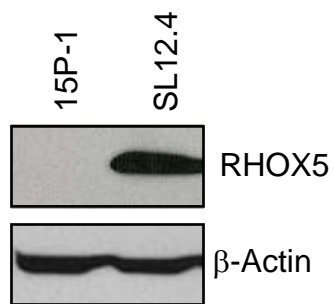

Supplemental Table 1. Transcripts downregulated by *Rhox5* (p<0.05)

| Probe set ID | fold  | Gene symbol  | Description                                                                                                            |
|--------------|-------|--------------|------------------------------------------------------------------------------------------------------------------------|
| 1455622 at   | 77.37 | ESTs         | Weakly similar to endoglycan; podocalyxin-like 2 (Homo sapiens) (H.sapiens)                                            |
| 1438799 at   | 28.01 | ESTs         | ESTs                                                                                                                   |
| 1438870 at   | 24.61 | /            | expressed sequence A1536462                                                                                            |
| 1437153 at   | 18.74 | /            | expressed sequence C85069                                                                                              |
| 1438248 at   | 15.7  | Pcsk5        | proprotein convertase subtilisin/kexin type 5                                                                          |
| 1441168 at   | 13.86 | ESTs         | ESTs, Weakly similar to B21124 Bkm-like sex-determining region hypothetical protein CS314 - fruit fly (D.melanogaster) |
| 1443211 at   | 12.79 | ESTs         | ESTs                                                                                                                   |
| 1441184 at   | 10.98 | ESTs         | ESTs                                                                                                                   |
| 1442378 x at | 10.95 | ESTs         | ESTs, Weakly similar to env polyprotein, retrovirus-related (M.musculus)                                               |
| 1429072 at   | 10.19 | /            | clone:1110001D15:KunitzBovine pancreatic trypsin inhibitor domain containing protein, full insert sequence.            |
| 1439177 at   | 9.466 | ESTs         | ESTs                                                                                                                   |
| 1426188 s at | 9.318 | /            | dexamethasone induced product, complete cds.                                                                           |
| 1440597 at   | 8.94  | ESTs         | ESTs                                                                                                                   |
| 1439914 at   | 8.83  | ESTs         | ESTs                                                                                                                   |
| 1431220 at   | 8.778 | /            | RIKEN cDNA 2810416G20 gene                                                                                             |
| 1448901 at   | 8.061 | Cpxm1        | Mus musculus carboxypeptidase X 1 (M14 family) (Cpxm1), mRNA.                                                          |
| 1435931 at   | 8.02  | ESTs         | ESTs                                                                                                                   |
| 1458331 x at | 7.441 | /            | Expressed sequence BB081581                                                                                            |
| 1423469 at   | 5.897 | /            | Mus musculus adult male testis cDNA, RIKEN full-length enriched library, clone:1700018E14.gb:NM_026461.1               |
| 1421692 at   | 5.274 | /            | calcium channel, voltage-dependent, R type, alpha 1E subunit                                                           |
| 1444288 at   | 5.025 | ESTs         | ESTs                                                                                                                   |
| 1440764 at   | 4.986 | ESTs         | ESTs, Weakly similar to S26689 hypothetical protein hc1 - mouse (M.musculus)                                           |
| 1435396 at   | 4.852 | ESTs         | expressed sequence C85317                                                                                              |
| 1446290 at   | 4.822 | ESTs         | ESTs                                                                                                                   |
| 1420787 at   | 4.726 | /            | RIKEN cDNA 4933436101                                                                                                  |
| 1431905 s at | 4.6   | /            | Mus musculus adult male testis cDNA, RIKEN full-length enriched library, clone:4933427G17                              |
| 1445154 at   | 4.537 | ESTs         | ESTs                                                                                                                   |
| 1425292 at   | 4.518 | Dtna         | Mus musculus alpha-dystrobrevin 2a mRNA, complete cds.                                                                 |
| 1427425 at   | 4.462 | /            | Unknown (protein for IMAGE:4237122)                                                                                    |
| 1429210 at   | 4.328 | /            | RIKEN cDNA 2810458L13 gene                                                                                             |
| 1427313 at   | 3.857 | Ptgir        | prostaglandin I receptor (IP)                                                                                          |
| 1428780 at   | 3.801 | /            | RIKEN full-length enriched library, clone:1300017K07                                                                   |
| 1458053 at   | 3.735 | ESTs         | ESTs                                                                                                                   |
| 1451462 a at | 3.521 | IFNAR2       | Mus musculus type I interferon receptor soluble isoform precursor (IFNAR2) mRNA, complete cds                          |
| 1449522 at   | 3.491 | Unc5c        | Mus musculus unc5 homolog (C. elegans) 3 (Unc5h3), mRNA.                                                               |
| 1456341 a at | 3.417 | Klf9         | Kruppel-like factor 9                                                                                                  |
| 1435723 at   | 3.334 | ESTs         | ESTs                                                                                                                   |
| 1436763 a at | 3.181 | Klf9         | Kruppel-like factor 9                                                                                                  |
| 1419689 at   | 3.162 | Gpc6         | Mus musculus glypican 6 (Gpc6), mRNA.                                                                                  |
| 1417963 at   | 2.878 | Pltp         | Mus musculus phospholipid transfer protein (Pltp), mRNA.                                                               |
| 1445667 at   | 2.85  | ESTs         | ESTs, Highly similar to S14234 hypothetical protein                                                                    |
| 1428802 at   | 2.817 | /            | RIKEN cDNA 1110038J12 gene                                                                                             |
| 1426894 s at | 2.716 | /            | Unknown (protein for IMAGE:5009979)                                                                                    |
| 1419359 at   | 2.704 | Clp1         | Mus musculus cardiac lineage protein 1 (Clp1), mRNA.                                                                   |
| 1452939 a at | 2.689 | /            | RIKEN full-length enriched library, clone:1110020B03:homolog to RETINAL DEGENERATION B BETA, full insert sequence.     |
| 1437667 a at | 2.638 | Bach2        | BTB and CNC homology 2                                                                                                 |
| 1434123 at   | 2.631 | /            | expressed sequence A1317183                                                                                            |
| 1453241 a at | 2.616 | /            | RIKEN cDNA 2810047C21 gene                                                                                             |
| 1456689 at   | 2.582 | ESTs         | ESTs                                                                                                                   |
| 1421053 at   | 2.55  | Kif1a        | Mus musculus kinesin heavy chain member 1A (Kif1a), mRNA.                                                              |
| 1436994 a at | 2.5   | H1f2         | H1 histone family, member 2                                                                                            |
| 1459895 at   | 2.494 | ESTs         | ESTs, Weakly similar to A57514 RNA helicase HEL117 - rat (R.norvegicus)                                                |
| 1440831 at   | 2.442 | ESTs         | ESTs                                                                                                                   |
| 1448398 s at | 2.438 | RPI22        | ribosomal protein L22                                                                                                  |
| 1437874 s at | 2.416 | /            | Mus musculus, Similar to elongation factor G2,                                                                         |
| 1441367 a at | 2.413 | ESTs         | ESTs                                                                                                                   |
| 1437683 x at | 2.401 | Serf2        | small EDRK-rich factor 2                                                                                               |
| 1424694 at   | 2.397 | /            | RIKEN cDNA 2010011I20 gene.                                                                                            |
| 1458318 at   | 2.335 | ESTs         | ESTs                                                                                                                   |
| 1441059 at   | 2.324 | ESTs         | ESTs                                                                                                                   |
| 1439060 s at | 2.322 | /            | Mus musculus, Similar to hypothetical protein FLJ10055                                                                 |
| 1436938 at   | 2.3   | ESTs         | ESTs, Weakly similar to RNA binding motif, single stranded interacting protein 1 (Mus musculus)                        |
| 1450923 at   | 2.296 | Tgfb2        | transforming growth factor, beta 2                                                                                     |
| 1429303 at   | 2.289 | /            | RIKEN full-length enriched library, clone:7420700M05:Zinc finger, C2H2 type containing protein, full insert sequence.  |
| 1458941 at   | 2.262 | ESTs         | ESTs                                                                                                                   |
| 1435998 at   | 2.25  | ESTs         | ESTs, Moderately similar to T47153 hypothetical protein DKFZp564A0772.1 (H.sapiens)                                    |
| 1455300 at   | 2.248 | ESTs         | ESTs                                                                                                                   |
| 1426306 a at | 2.241 | Maged2       | Mus musculus mage-d2 mRNA, complete cds                                                                                |
| 1417879 at   | 2.239 | /            | Mus musculus RIKEN cDNA 1110060M21 gene                                                                                |
| 1451386 at   | 2.232 | /            | Unknown (protein for MGC:27866)                                                                                        |
| 1441763 at   | 2.215 | ESTs         | ESTs                                                                                                                   |
| 1423909 at   | 2.209 | /            | RIKEN cDNA 0610011I04 gene                                                                                             |
| 1452952 at   | 2.165 | /            | RIKEN full-length enriched library, clone:9030418K01                                                                   |
| 1436085 at   | 2.159 | ESTs         | ESTs                                                                                                                   |
| 1421451 at   | 2.135 | Crb1         | Mus musculus crumbs homolog 1 (Drosophila) (Crb1), mRNA.                                                               |
| 1431067 at   | 2.128 | /            | RIKEN cDNA 6330404A07 gene                                                                                             |
| 1416332 at   | 2.115 | Cirbp        | Mus musculus cold inducible RNA binding protein (Cirbp), mRNA.                                                         |
| 1418004 a at | 2.101 | LR8          | Mus musculus RIKEN cDNA 1810009M01 gene (1810009M01Rik), mRNA.                                                         |
| 1418534 at   | 2.092 | Fzd2         | frizzled homolog 2 (Drosophila)                                                                                        |
| 1426624 a at | 2.091 | /            | RIKEN cDNA 0610043B10 gene                                                                                             |
| 1460499 at   | 2.079 | /            | Mus musculus adult male epididymis cDNA, RIKEN full-length enriched library, clone:9230110I02                          |
| 1438127 at   | 2.079 | /            | ESTs                                                                                                                   |
| 1447509 at   | 2.076 | /            | ESTs                                                                                                                   |
| 1456624 at   | 2.067 | /            | Mus musculus, Similar to hypothetical protein FLJ10055                                                                 |
| 1436933 at   | 2.067 | /            | ESTs                                                                                                                   |
| 1421048 a at | 2.06  | /            | Mus musculus cardiac Abnormalityabnormal facies (CATCH22), microdeletion syndrome (Dgl1-pending), mRNA.                |
| 1415961 at   | 2.059 | Itm3-pending | Mus musculus integral membrane protein 3 (Itm3-pending), mRNA.                                                         |
| 1427139 at   | 2.057 | Adams10      | Mus musculus zinc metalloproteinase (Adams10) mRNA, partial cds                                                        |
| 1451017 at   | 2.032 | Sdbcag84     | serologically defined breast cancer antigen 84                                                                         |
| 1444406 at   | 2.018 | ESTs         | ESTs                                                                                                                   |
| 1451674 at   | 2.009 | Sic12a5      | Mus musculus strain ILS K-CI cotransporter (Sic12a5) mRNA, complete cds                                                |

Supplemental Table 2. Transcripts upregulated by *Rhox5* (p<0.05)

| Probe set ID | fold    | Gene symbol | Description                                                                                                             |
|--------------|---------|-------------|-------------------------------------------------------------------------------------------------------------------------|
| 1423614 at   | 2.000   | /           | expressed sequence AI326115                                                                                             |
| 1419077 at   | 2.004   | Mpp3        | Mus musculus membrane protein, palmitoylated 3 (MAGUK p55 subfamily member 3) (Mpp3), mRNA.                             |
| 1456083 at   | 2.004   | /           | expressed sequence AI315324                                                                                             |
| 1443050 at   | 2.008   | ESTs        | ESTs, Moderately similar to RIKEN cDNA 5730493B19                                                                       |
| 1457281 at   | 2.008   | ESTs        | ESTs, Weakly similar to T24396 hypothetical protein T03F6.2 - <i>Caenorhabditis elegans</i> ( <i>C.elegans</i> )        |
| 1427739 a at | 2.028   | Trp53       | Mus musculus mRNA for transformation related protein 53 (Trp53 gene).                                                   |
| 1450090 at   | 2.033   | Zfp101      | Mus musculus zinc finger protein 101 (Zfp101), mRNA.                                                                    |
| 1424832 at   | 2.041   | /           | Unknown (protein for MGC:30299)                                                                                         |
| 1424201 a at | 2.045   | /           | RIKEN cDNA 2610007A16 gene                                                                                              |
| 1439563 at   | 2.053   | /           | expressed sequence AI854635                                                                                             |
| 1431315 at   | 2.062   | /           | RIKEN cDNA 3010015K02 gene                                                                                              |
| 1437700 at   | 2.070   | ESTs        | ESTs                                                                                                                    |
| 1438196 at   | 2.083   | /           | DNA segment, Chr 9, ERATO Doi 660, expressed                                                                            |
| 1426339 at   | 2.101   | /           | Mus musculus AK5 mRNA for adenylate kinase isozyme 5, complete cds.                                                     |
| 1426631 at   | 2.101   | /           | Mus musculus, Similar to hypothetical protein, clone MGC:7703 IMAGE:3497634, mRNA, complete cds                         |
| 1420646 at   | 2.101   | /           | hypothetical protein, MGC:7199                                                                                          |
| 1421015 s at | 2.105   | Pole3       | Mus musculus DNA polymerase epsilon, subunit 3 (Pole3), mRNA. /PROD=NF-YB-like protein                                  |
| 1417767 at   | 2.110   | /           | RIKEN cDNA 1810044O22 gene                                                                                              |
| 1451056 at   | 2.110   | Psmid7      | proteasome (prosome, macropain) 26S subunit, non-ATPase, 7                                                              |
| 1419749 at   | 2.114   | Dnmt2       | Mus musculus DNA methyltransferase 2 (Dnmt2), mRNA.                                                                     |
| 1456192 x at | 2.132   | ESTs        | ESTs                                                                                                                    |
| 1438003 at   | 2.137   | ESTs        | ESTs, Highly similar to LAK-1 ( <i>H.sapiens</i> )                                                                      |
| 1417183 at   | 2.160   | DnaJA2      | DnaJ (Hsp40) homolog, subfamily A, member 2                                                                             |
| 1430778 a at | 2.160   | /           | nucleotide binding protein 1                                                                                            |
| 1444676 at   | 2.174   | ESTs        | ESTs, Weakly similar to TYROSINE-PROTEIN KINASE JAK3 ( <i>M.musculus</i> )                                              |
| 1421055 at   | 2.174   | /           | exportin 4                                                                                                              |
| 1421972 s at | 2.183   | Hcfc1       | host cell factor C1                                                                                                     |
| 1458541 at   | 2.183   | ESTs        | ESTs                                                                                                                    |
| 1431073 at   | 2.198   | /           | Protein prenyltransferase alpha subunit repeat containing protein,                                                      |
| 1454006 a at | 2.198   | /           | RIKEN full-length enriched library, clone:4933428E22:DNA segment, Human S2298E, full insert sequence.                   |
| 1457528 at   | 2.217   | ESTs        | ESTs, Weakly similar to T14031 sodium bicarbonate cotransporter, pancreatic - mouse ( <i>M.musculus</i> )               |
| 1434653 at   | 2.222   | Ptk2b       | protein tyrosine kinase 2 beta                                                                                          |
| 1454036 a at | 2.304   | /           | RIKEN full-length enriched library, clone:4921514G19:homolog to DEUBIQUITINATING ENZYME UBP109, full insert sequence.   |
| 1433942 at   | 2.304   | ESTs        | ESTs                                                                                                                    |
| 1459265 at   | 2.304   | ESTs        | ESTs, Weakly similar to MYOSIN I ALPHA ( <i>M.musculus</i> )                                                            |
| 1448119 at   | 2.392   | Bpgm        | 2,3-bisphosphoglycerate mutase                                                                                          |
| 1454955 at   | 2.410   | /           | RIKEN cDNA 5730403B10 gene                                                                                              |
| 1454090 at   | 2.415   | /           | RIKEN full-length enriched library, clone:2700031G06:trans-prenyltransferase, full insert sequence.                     |
| 1428968 at   | 2.427   | /           | Mus musculus adult male testis cDNA, RIKEN full-length enriched library, clone:4921511I07                               |
| 1449645 s at | 2.469   | /           | expressed sequence AL024092                                                                                             |
| 1418023 at   | 2.519   | /           | NMDA receptor-regulated gene 1                                                                                          |
| 1425373 a at | 2.519   | /           | Mus musculus, Similar to x 003 protein, clone MGC:27732 IMAGE:2646038, mRNA, complete cds.06.1                          |
| 1452232 at   | 2.532   | /           | expressed sequence AI225872                                                                                             |
| 1453435 a at | 2.551   | /           | Mus musculus adult male tongue cDNA, RIKEN full-length enriched library, clone:2310042I22                               |
| 1427253 s at | 2.571   | /           | Mus musculus, clone IMAGE:3485208, mRNA, partial cds                                                                    |
| 1452012 a at | 2.611   | /           | Mus musculus, RIKEN cDNA 2610104C07 gene                                                                                |
| 1450986 at   | 2.618   | Nol5        | nucleolar protein 5                                                                                                     |
| 1432016 a at | 2.632   | ldh3a       | isocitrate dehydrogenase 3 (NAD+) alpha                                                                                 |
| 1453983 a at | 2.646   | /           | RIKEN cDNA 2810013M15 gene                                                                                              |
| 1442549 at   | 2.674   | ESTs        | ESTs                                                                                                                    |
| 1426908 at   | 2.681   | /           | expressed sequence AI225872                                                                                             |
| 1416756 at   | 2.688   | DnaJB1      | DnaJ (Hsp40) homolog, subfamily B, member 1                                                                             |
| 1437179 at   | 2.710   | ESTs        | ESTs, Moderately similar to unnamed protein product ( <i>H.sapiens</i> )                                                |
| 1453854 at   | 2.717   | /           | Mus musculus adult male small intestine cDNA, RIKEN full-length enriched library, clone:2010013L17                      |
| 1452983 at   | 2.825   | /           | RIKEN cDNA 4931428M20 gene                                                                                              |
| 1447717 x at | 2.849   | ESTs        | ESTs                                                                                                                    |
| 1458447 at   | 2.874   | ESTs        | ESTs, Moderately similar to CENF_HUMAN CENP-F KINETOCHORE PROTEIN ( <i>H.sapiens</i> )                                  |
| 1451026 at   | 3.021   | /           | ectoplacental cone, invasive trophoblast giant cells, extraembryonic ectoderm and chorion sequence 3                    |
| 1429228 at   | 3.030   | /           | RIKEN cDNA 4930534B04 gene                                                                                              |
| 1415864 at   | 3.175   | Bpgm        | Bpgm /PROD=2,3-bisphosphoglycerate mutase                                                                               |
| 1452115 a at | 3.215   | sk-18       | serinethreonine kinase 18                                                                                               |
| 1422802 at   | 3.279   | Defcr3      | Mus musculus defensin related cryptdin 3 (Defcr3), mRNA.                                                                |
| 1425388 a at | 3.311   | /           | Unknown (protein for MGC:31041)                                                                                         |
| 1458599 at   | 3.344   | ESTs        | ESTs                                                                                                                    |
| 1445251 at   | 3.401   | ESTs        | ESTs                                                                                                                    |
| 1429625 at   | 3.676   | /           | RIKEN cDNA 2900054C01 gene                                                                                              |
| 1441205 at   | 3.817   | ESTs        | ESTs                                                                                                                    |
| 1450087 a at | 3.876   | Nolc1       | Mus musculus nucleolar and coiled-body phosphoprotein 1 (Nolc1), mRNA. /PROD=RIKEN cDNA 3230402K17                      |
| 1428838 a at | 4.329   | Dck         | Dck /UG TITLE=deoxycytidine kinase                                                                                      |
| 1422168 a at | 4.854   | Bdnf        | Mus musculus brain derived neurotrophic factor (Bdnf), mRNA. /PROD=brain derived neurotrophic factor                    |
| 1450091 at   | 5.051   | Ighmbp2     | Mus musculus immunoglobulin mu binding protein 2 (Ighmbp2), mRNA. /PROD=immunoglobulin S mu binding protein 2           |
| 1429734 at   | 5.376   | /           | Mus musculus 0 day neonate skin cDNA, RIKEN full-length enriched library, clone:4632434I11                              |
| 1429658 a at | 5.682   | /           | RIKEN cDNA 5730502P04 gene                                                                                              |
| 1433902 at   | 6.061   | /           | expressed sequence AU040152                                                                                             |
| 1440864 at   | 6.061   | /           | expressed sequence AI836737                                                                                             |
| 1429660 s at | 6.135   | /           | RIKEN cDNA 5730502P04 gene                                                                                              |
| 1424967 x at | 6.536   | /           | Mus musculus cardiac troponin T isoform A2b mRNA, complete cds. /PROD=cardiac troponin T isoform A2b                    |
| 1454480 at   | 7.353   | /           | Mus musculus adult male testis cDNA, RIKEN full-length enriched library, clone:4933439N06                               |
| 1422966 a at | 8.475   | Trfr        | Mus musculus transferrin receptor (Trfr), mRNA.                                                                         |
| 1446523 at   | 9.009   | ESTs        | ESTs                                                                                                                    |
| 1454437 at   | 9.615   | /           | RIKEN full-length enriched library, clone:4933412F11:similar to Y-LINKED TESTIS-SPECIFIC PROTEIN, full insert sequence. |
| 1450940 at   | 10.493  | Gdap1       | ganglioside-induced differentiation-associated-protein 1                                                                |
| 1430268 at   | 10.718  | /           | RIKEN cDNA 9630005C17 gene                                                                                              |
| 1445974 at   | 11.507  | ESTs        | ESTs                                                                                                                    |
| 1431539 at   | 14.164  | Samsn1      | SAM domain, SH3 domain and nuclear localisation signals, 1                                                              |
| 1446889 at   | 14.245  | /           | DNA segment, Chr 2, ERATO Doi 105, expressed                                                                            |
| 1416034 at   | 16.584  | CD24a       | CD24a antigen                                                                                                           |
| 1447565 at   | 25.000  | ESTs        | ESTs                                                                                                                    |
| 1455179 at   | 29.499  | /           | RIKEN cDNA 1110068J02 gene                                                                                              |
| 1426712 at   | 50.761  | /           | Mus musculus, clone IMAGE:5361283, mRNA, partial cds                                                                    |
| 1420514 at   | 253.165 | Tm4sf10     | transmembrane 4 superfamily member 10                                                                                   |

Supplemental Figure 3

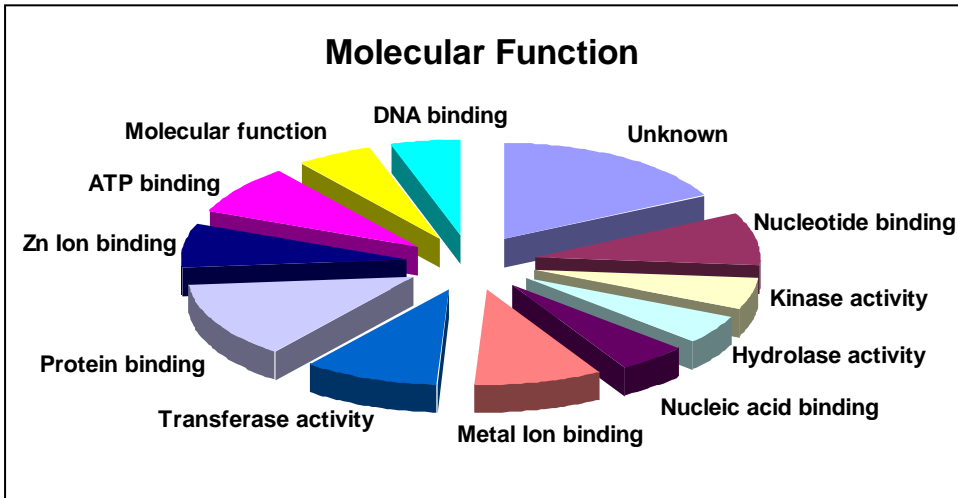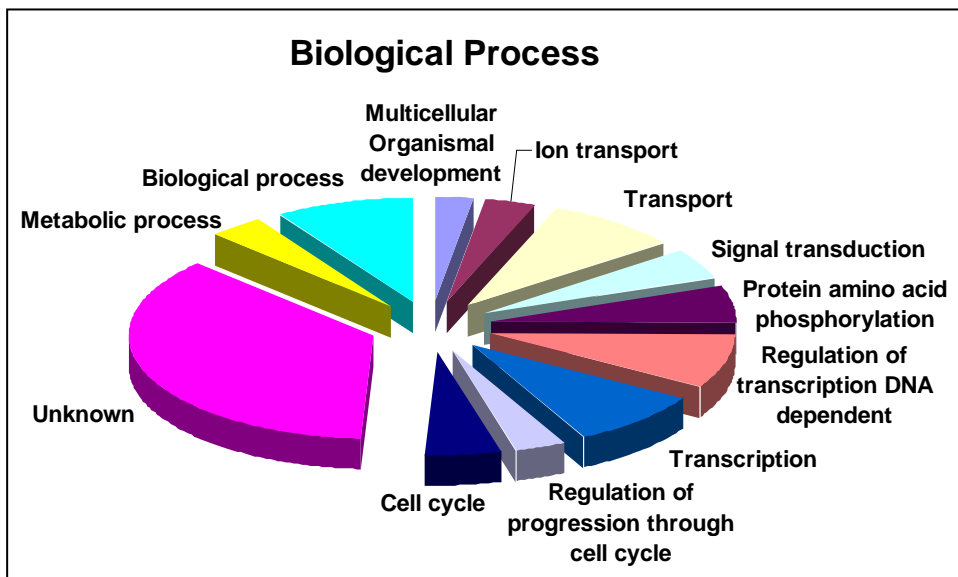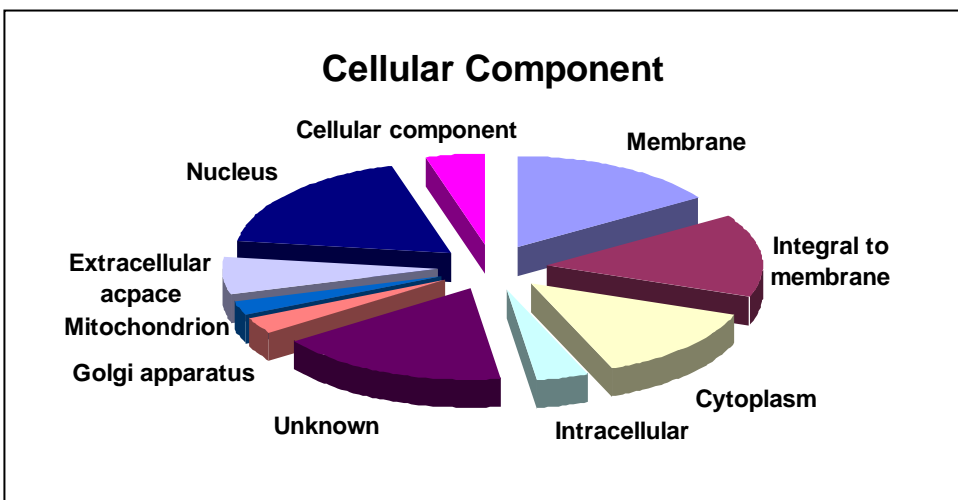

Supplemental Figure 4

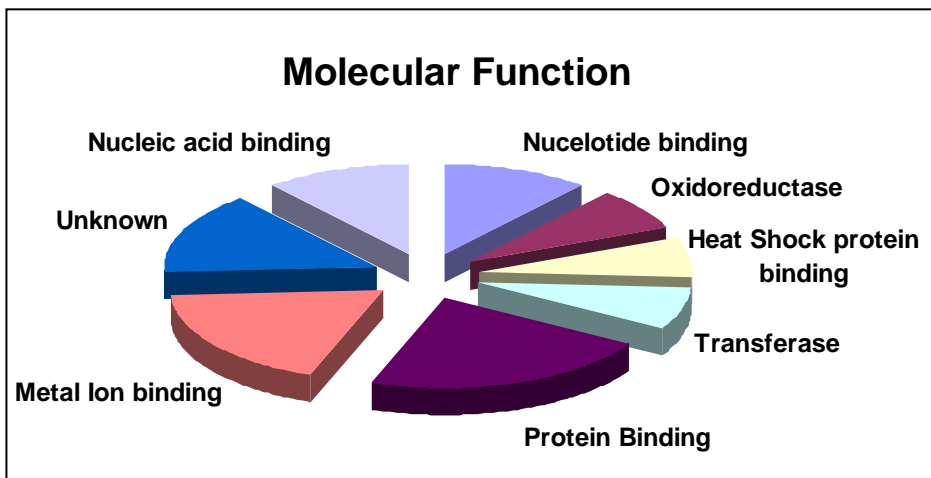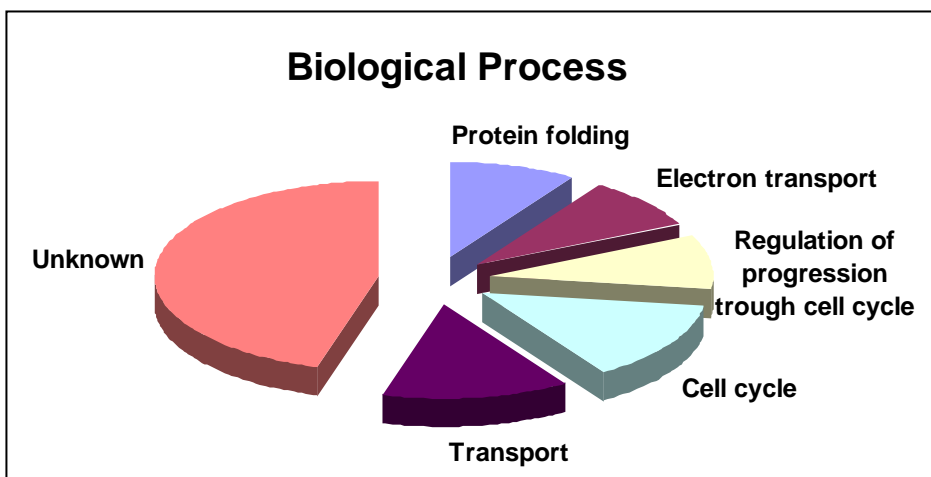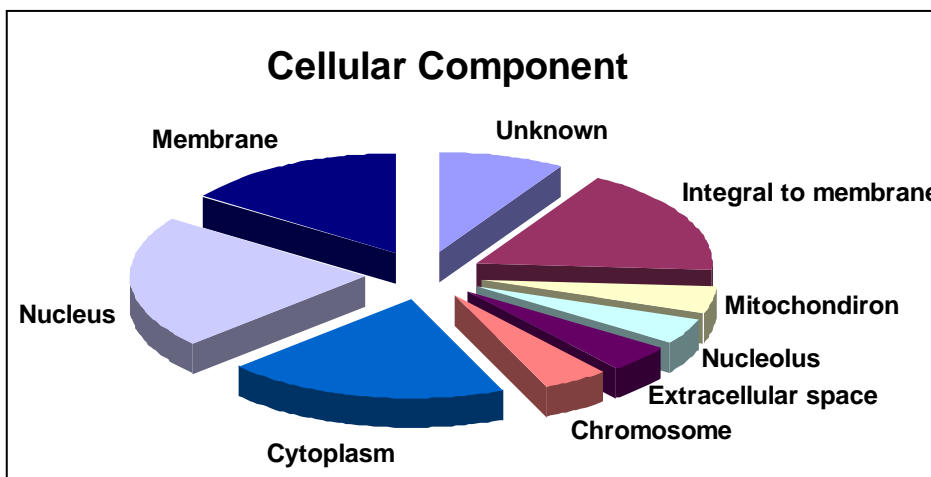

Supplemental Figure 5

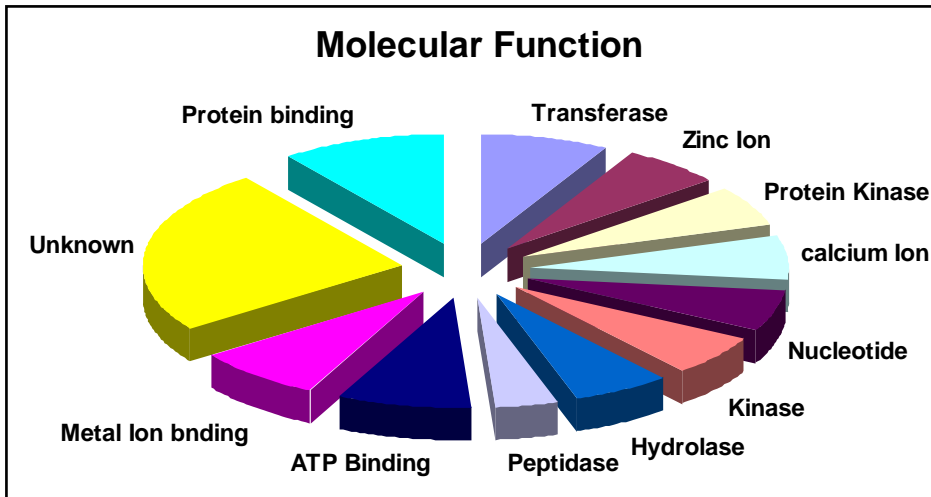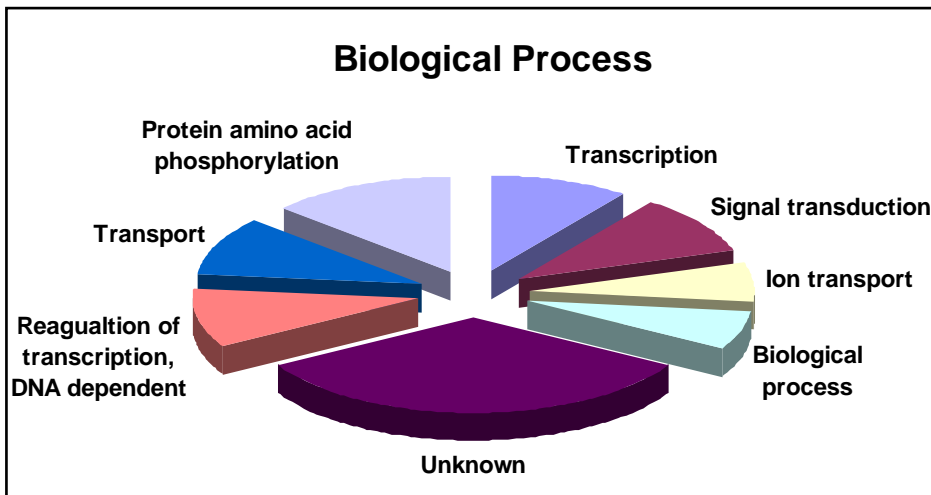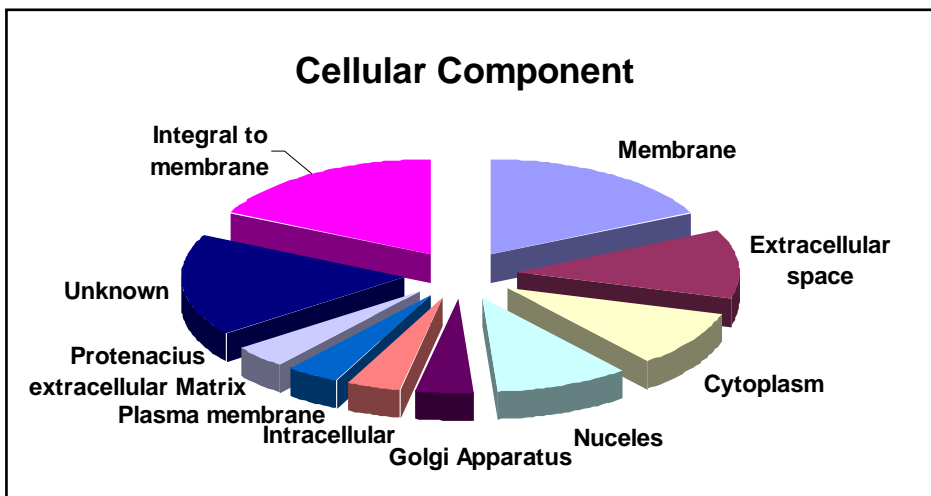



Supplemental figure 6.

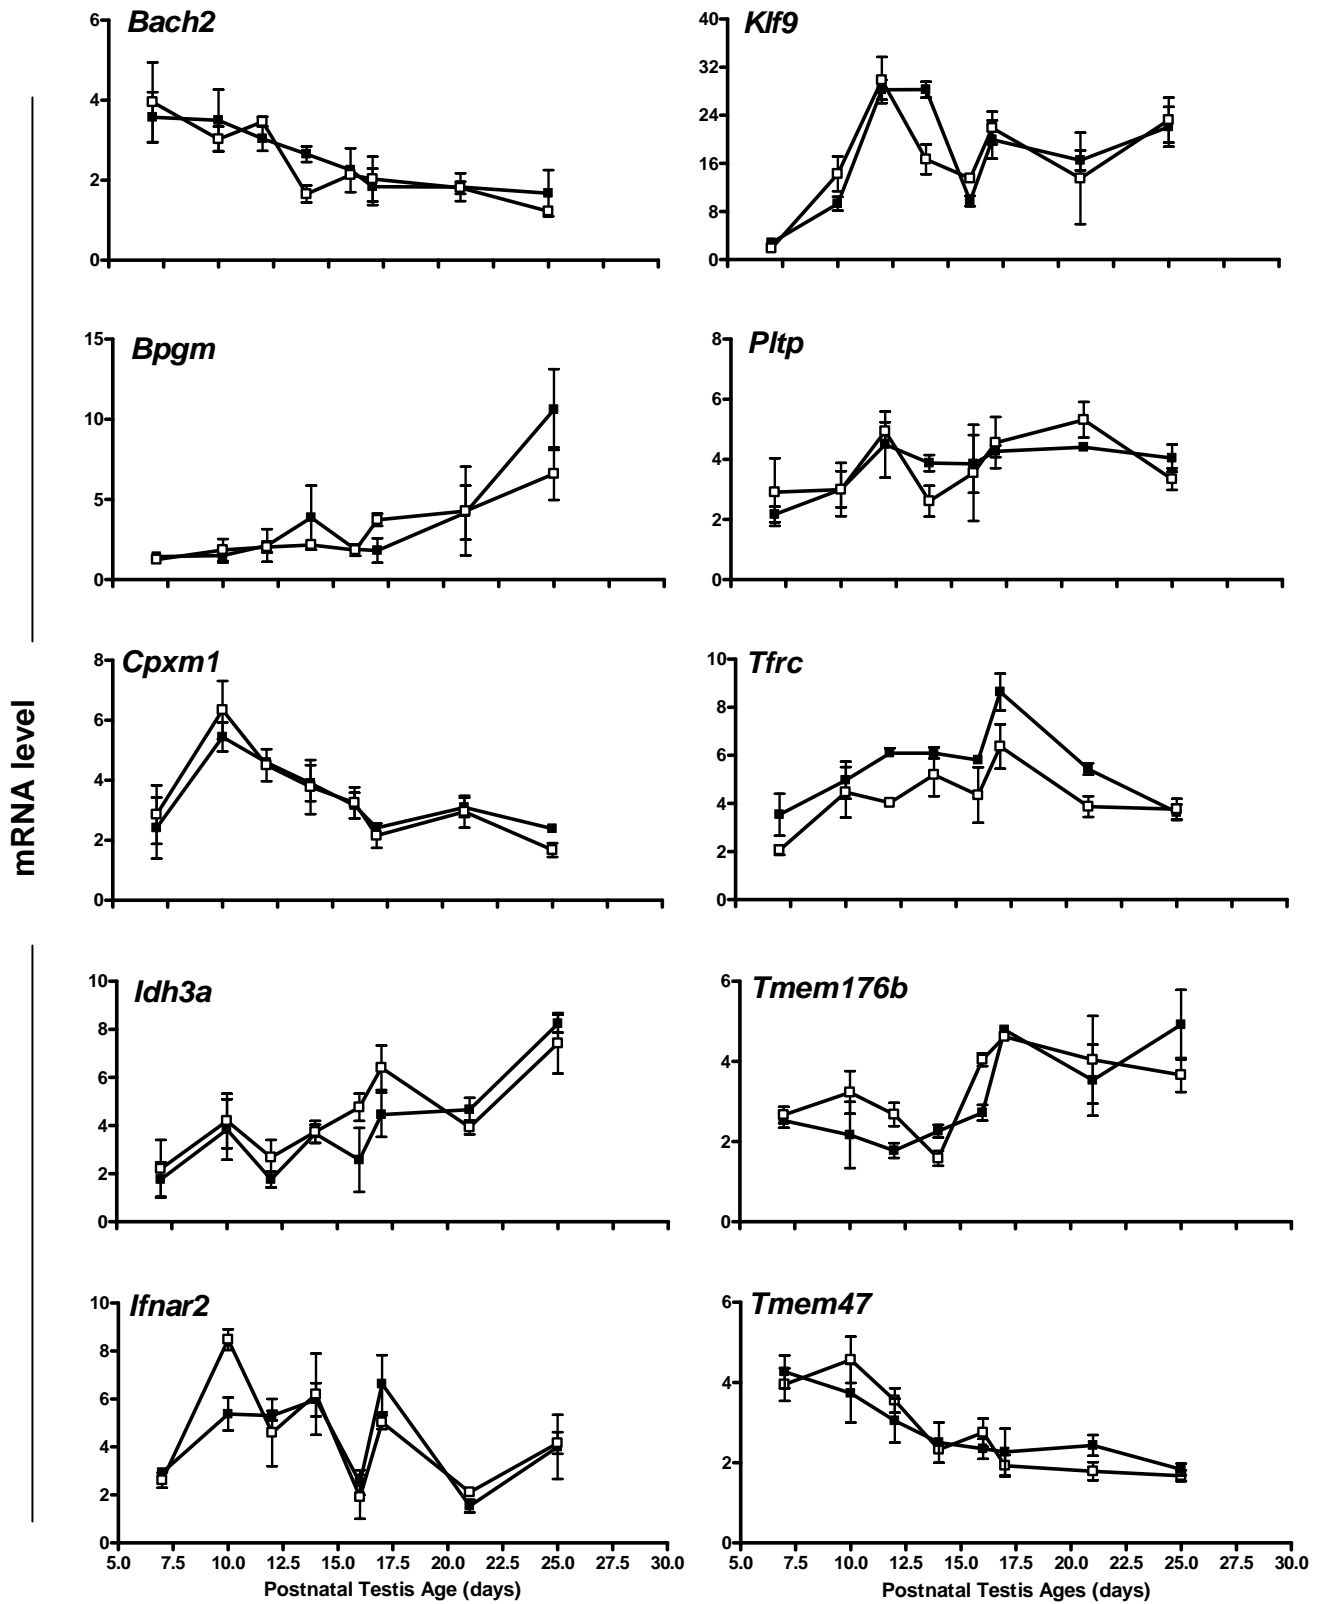

**Supplemental Table 3. Consensus AREs in candidate SAR genes**

| <b>Gene symbol</b> | <b>AREs</b>         |                     |
|--------------------|---------------------|---------------------|
|                    | <b>5'- flanking</b> | <b>3'- flanking</b> |
| <i>Bpgm</i>        | none                | 1 site              |
| <i>Fzd2</i>        | none                | none                |
| <i>Ifnar2</i>      | 2 sites             | none                |
| <i>Gdap1</i>       | none                | none                |
| <i>Pltp</i>        | none                | 1 site              |
| <i>Tmem176a</i>    | 1 site              | 1 site              |
| <i>Tmem176b</i>    | none                | none                |
| <i>Unc5c</i>       | none                | none                |

Consensus AREs in the 5' and 3' flanking regions (1 kb) determined using the Genomatix program.

# Supplemental Figure 7

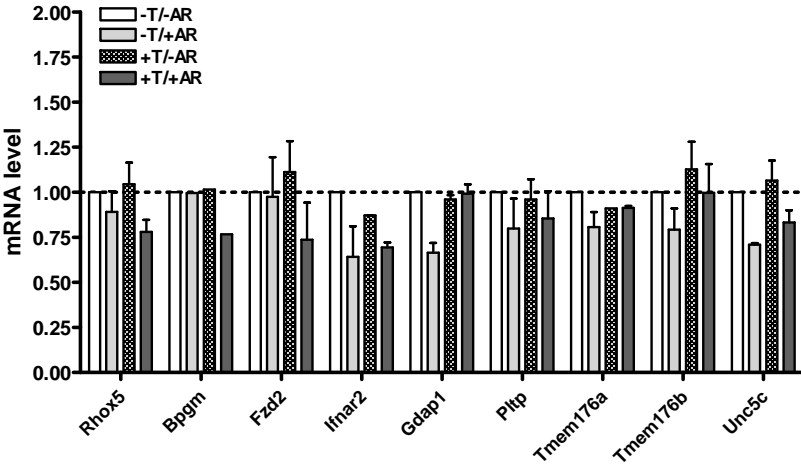

**Supplemental Table 4. Oligonucleotides**

| <b>Name</b> | <b>Orientation</b> | <b>Sequence</b>            |
|-------------|--------------------|----------------------------|
| MDA-1287    | Sense              | 5' - GCCTGGGAGTCAAGGAA     |
| MDA-1444    | Sense              | 5' - TGGGCACTTTCCATACCTTC  |
| MDA-1445    | Antisense          | 5' - GTTGCCACGTTTCATCACTTG |
| MDA-1556    | Sense              | 5' - CCAGTGTCCCCATGCTCAAC  |
| MDA-1557    | Antisense          | 5' - TGCATGGTCCTTCCAGGTCT  |
| MDA-1558    | Sense              | 5' - GACCAAAAGCTGAGGCTGAGA |
| MDA-1559    | Antisense          | 5' - CAATGTGGCCATCAGGGTAGA |
| MDA-1625    | Sense              | 5' - CTGAAGGTCAAAGGGAATGT  |
| MDA-1626    | Antisense          | 5' - GGACAGAGTCTTGATGATCTC |
| MDA-1784    | Sense              | 5' - CAGCATTATTCCAGTGGATG  |
| MDA-1785    | Antisense          | 5' - GGGCACTTGCACAGAGATG   |
| MDA-1904    | Antisense          | 5' - ATTCTTCTCCTTCGCCTTC   |
| MDA-2097    | Sense              | 5' - GAGTTTGCTGACACCATCAA  |
| MDA-2098    | Antisense          | 5' - TAGTGTTTCATCTCGCCAGAC |
| MDA-2099    | Sense              | 5' - CCATTACAGAGTGCATACAG  |
| MDA-2100    | Antisense          | 5' - AATCTCTTCTCACACAGTGG  |
| MDA-2101    | Sense              | 5' - AGTGAGTCGTGTCCTGTGC   |
| MDA-2102    | Antisense          | 5' - GGATGTCGTGGATGAACTC   |
| MDA-2103    | Sense              | 5' - GACAATTTGCCCAATGTCTTg |
| MDA-2104    | Antisense          | 5' - CTGCCATCCTCATAATCGTA  |
| MDA-2105    | Sense              | 5' - GAGAGTAGATGAAACCTCTG  |
| MDA-2106    | Antisense          | 5' - ACGTATGCCTTCCGACTCT   |
| MDA-2107    | Sense              | 5' - CATTGCGAATCCACTCTCG   |
| MDA-2108    | Antisense          | 5' - CATGACAGCAACAGGTCTG   |
| MDA-2109    | Sense              | 5' - AGACCTGGAGGAGCTGGA    |
| MDA-2110    | Antisense          | 5' - TAACAGTGGCAGTGTCGG    |
| MDA-2113    | Sense              | 5' - CGTCCGAAGCTGGAAATG    |
| MDA-2114    | Antisense          | 5' - CTATGGAGATCAGGTTCAA   |
| MDA-2115    | Sense              | 5' - TTCAGCCTCAGTCATGAAGA  |
| MDA-2116    | Antisense          | 5' - CCCATCTTGTTCTTATCCAT  |
| MDA-2223    | Sense              | 5' - CTGAATCCTCTGCATCAACAA |
| MDA-2224    | Antisense          | 5' - GTTGAGCAGTGGATACACCTG |
| MDA-3628    | Sense              | 5' - GACGTGGATGTGCAGAAGAT  |
| MDA-3629    | Antisense          | 5' - GTGGTGGAGGAGGAGGATTA  |
| MDA-3662    | Sense              | 5' - TTGGAGCAGCTGCTGGG     |
| MDA-3663    | Antisense          | 5' - GCACAGCTCAGTCCAAGG    |
| MDA-3689    | Sense              | 5' - GTTCTGGAGAGACTTCTTC   |
| MDA-3690    | Antisense          | 5' - CCAGCAGAATCGGAACTC    |
| MDA-3693    | Sense              | 5' - GTGGTGCAGACTGTGCTG    |
| MDA-3694    | Antisense          | 5' - CCAGCAGGTACCACCCC     |
| MDA-4077    | Sense              | 5' - TTTGCAGCGCACTAATTCCTT |
| MDA-4080    | Antisense          | 5' - CCGCAGCCCTCCTGATCT    |
| MDA-4388    | Sense              | 5' - CTTCTGGCACTGCTCCTA    |
| MDA-4389    | Antisense          | 5' - ACCAGCTGTGGACTGCAG    |
| MDA-4390    | Sense              | 5' - TGAGCAGACTTTTCTGGATG  |
| MDA-4391    | Antisense          | 5' - ACAGTGAGCTCAGGATGCAA  |
| MDA-4392    | Sense              | 5' - CGACTTCACAGTCTACATG   |
| MDA-4393    | Antisense          | 5' - CGCTTCACACAGTGGTCTC   |
| MDA-4394    | Sense              | 5' - GAGACCATCACCATCCAG    |
| MDA-4395    | Antisense          | 5' - CGTTGGAGATGTTACAGCAG  |
| MDA-4396    | Sense              | 5' - CAAAGATGCTCTTCTCACCT  |
| MDA-4397    | Antisense          | 5' - CTGTTGTAACATCGTGGTTAA |
